# Supplementary material for: Room temperature chemical transformation of SnSe to Ag2Se nanocrystals via cation exchange
Source: Royal Society of Chemistry journal article supplement (doi:10.1039/d4ma00394b), 2024-01-01
Supplement: d4ma00394b1.pdf [file d4ma00394b1.pdf]

## Supporting Information

### Room Temperature Chemical Transformation of SnSe to Ag<sub>2</sub>Se Nanocrystals via Cation Exchange<sup>†</sup>

Yiqiao Huang, Pierre F. P. Poudeu\*

**Table S1:** Quantitative EDX analysis of Ag, Sn, and Se elements in SnSe precursor and Ag<sub>2</sub>Se/SnSe nanocomposites

| Sample code | Theoretical Ag at% | Experimental Ag at% | Theoretical Sn at% | Experimental Sn at% | Theoretical Se at% | Experimental Se at% |
|-------------|--------------------|---------------------|--------------------|---------------------|--------------------|---------------------|
| SnSe        | 0.0                | 0.000               | 50.0               | 47.7(2)             | 50.00              | 52.3(2)             |
| A-10        | 9.5                | 9.6(1)              | 42.9               | 42.2(1)             | 47.6               | 48.1(2)             |
| A-18        | 17.1               | 16.0(1)             | 37.1               | 33.6(1)             | 45.7               | 50.4(2)             |
| A-20        | 18.2               | 17.7(1)             | 36.4               | 31.3(2)             | 45.5               | 51.0(2)             |
| A-37        | 31.6               | 31.0(2)             | 26.4               | 22.9(2)             | 42.1               | 46.2(1)             |
| A-50        | 40.0               | 38.6(2)             | 20.0               | 14.7(1)             | 40.0               | 46.7(2)             |
| A-75        | 54.6               | 56.7(2)             | 9.1                | 3.4(0.2)            | 36.4               | 39.9(2)             |
| A-100       | 66.7               | 64.2(1)             | 0.0                | 0.2(0.1)            | 33.3               | 35.7(1)             |

**Table S2:** Lattice parameters of SnSe and Ag<sub>2</sub>Se, and phase composition of various SnSe/Ag<sub>2</sub>Se nanocomposites extracted for the refinement of XRD data.

|                    |                                             | SnSe   | A-10   | A-18   | A-20   | A-37    | A-50    | A-75    | A-100   |
|--------------------|---------------------------------------------|--------|--------|--------|--------|---------|---------|---------|---------|
| SnSe               | a(Å)                                        | 11.518 | 11.522 | 11.522 | 11.524 | 11.529  | 11.526  | 11.657  | -       |
|                    | b(Å)                                        | 4.163  | 4.148  | 4.146  | 4.142  | 4.146   | 4.167   | 4.165   | -       |
|                    | c(Å)                                        | 4.409  | 4.440  | 4.453  | 4.454  | 4.448   | 4.418   | 4.411   | -       |
|                    | Unit cell volume(Å <sup>3</sup> )           | 211.42 | 212.22 | 212.75 | 212.63 | 212.57  | 212.21  | 214.17  | -       |
|                    | Fraction of SnSe Nominal                    | 100.0  | 90.0   | 81.3   | 80.0   | 62.5    | 50.0    | 25.0    | 0.0     |
|                    | Fraction of SnSe Experimental               | 100.0  | 100.0  | 100.0  | 100.0  | 72.5(1) | 40.5(2) | 31.2(1) | 0.0     |
|                    | Bragg R-factor                              | 8.8    | 2.6    | 2.7    | 2.1    | 2.4     | 5.0     | 4.9     | -       |
|                    |                                             |        |        |        |        |         |         |         |         |
| Ag <sub>2</sub> Se | a(Å)                                        | -      | -      | -      | -      | 4.329   | 4.331   | 4.338   | 4.331   |
|                    | b(Å)                                        | -      | -      | -      | -      | 7.073   | 7.081   | 7.074   | 7.064   |
|                    | c(Å)                                        | -      | -      | -      | -      | 7.807   | 7.831   | 7.789   | 7.777   |
|                    | volume(Å <sup>3</sup> )                     | -      | -      | -      | -      | 239.05  | 240.19  | 239.01  | 237.95  |
|                    | Fraction of Ag <sub>2</sub> Se Nominal      | 0.000  | 10.000 | 18.750 | 20.000 | 37.500  | 50.000  | 75.000  | 100.000 |
|                    | Fraction of Ag <sub>2</sub> Se Experimental | 0.000  | 0.000  | 0.000  | 0.000  | 27.5(1) | 59.5(2) | 68.8(1) | 100.0   |
|                    | Bragg R-factor                              | -      | -      | -      | -      | 8.7     | 6.1     | 4.3     | 5.6     |
|                    |                                             |        |        |        |        |         |         |         |         |

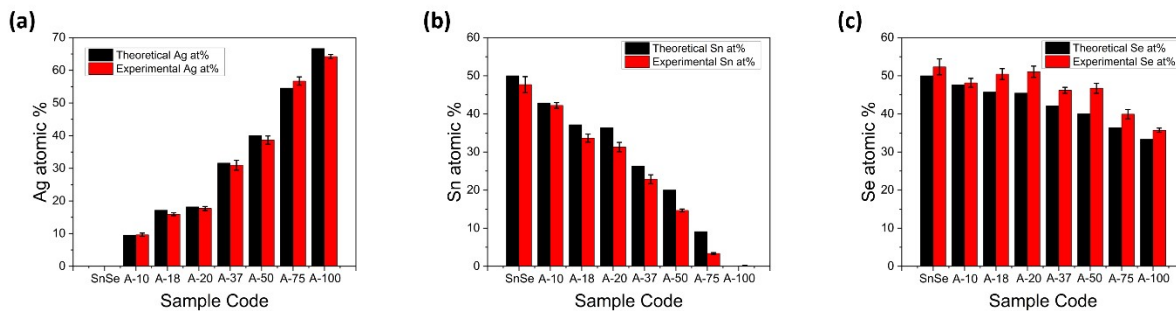

**Figure S1:** Quantitative EDX analysis showing the experimental and theoretical atomic percentages (a) Ag, (b) Sn, and (c) Se in various SnSe/Ag<sub>2</sub>Se nanocomposites.

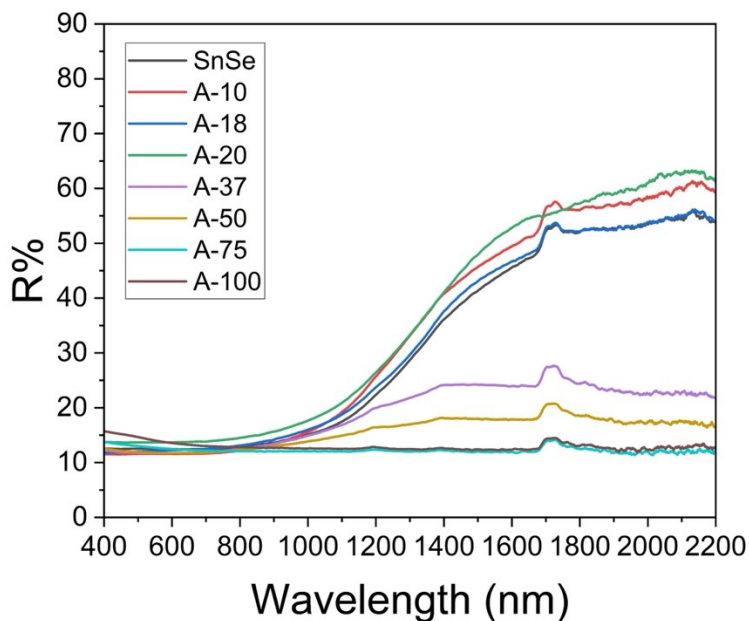

**Figure S2:** UV-Vis-NIR Diffuse reflectance data at 300 K on the SnSe precursor as well as on various SnSe/Ag<sub>2</sub>Se nanocomposites.

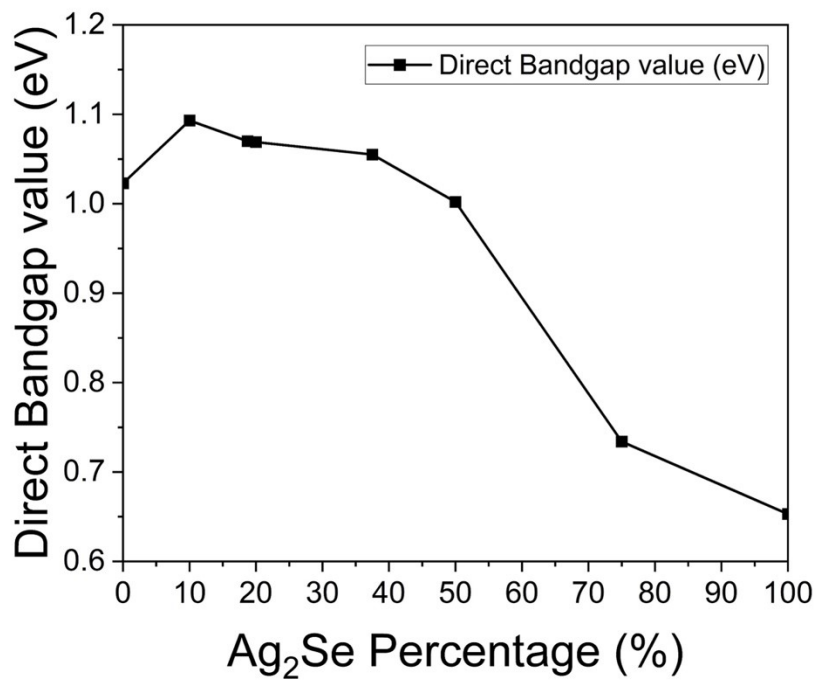

**Figure S3:** Change in band gap of various SnSe/Ag<sub>2</sub>Se nanocomposites with increasing Ag<sub>2</sub>Se content.
